# Supplementary material for: Thermo-Responsive Injectable Hydrogels Formed by Self-Assembly of Alginate-Based Heterograft Copolymers
Source: MDPI journal article supplement (doi:10.3390/gels9030236), 2023-03-17
Supplement: s1 [file s1]

## Supporting Information

### Thermo-responsive Injectable Hydrogels Formed by Self-assembly of Alginate-based Heterograft Copolymers

Konstantinos Safakas<sup>1</sup>, Sofia-Falia Saravanou<sup>1</sup>, Zacharoula Iatridi<sup>1</sup>, Constantinos Tsitsilianis<sup>1,\*</sup>

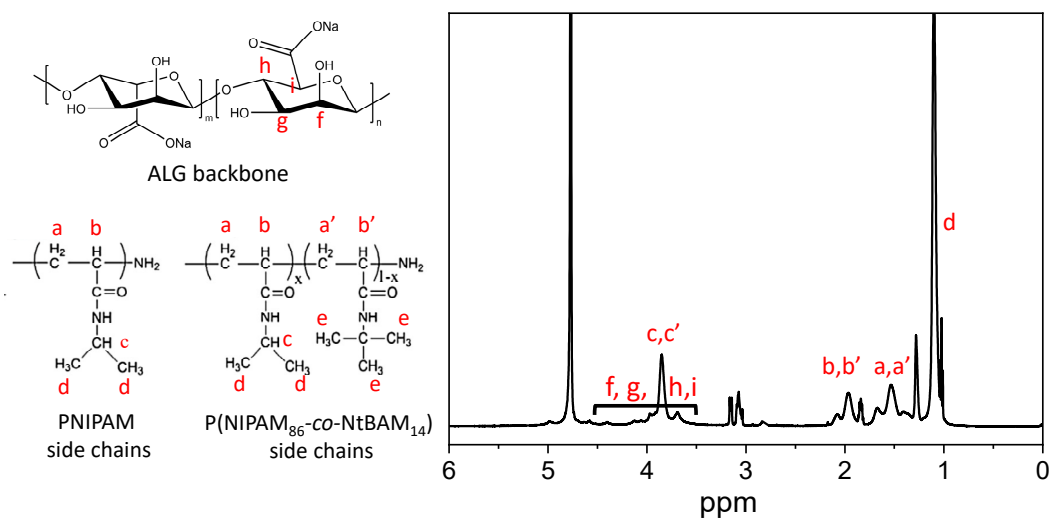

Figure S1. <sup>1</sup>H-NMR spectrum of ALG/HGC in D<sub>2</sub>O.
